# Supplementary material for: Swelling-induced mesoporous block copolymer membranes with intrinsically active surfaces for size-selective separation
Source: Royal Society of Chemistry journal article supplement (doi:10.1039/c2jm34292h), 2012-01-01
Supplement: c2jm34292h.pdf [file c2jm34292h.pdf]

## **Electronic Supplementary Information:**

*For*

### **Swelling-induced Mesoporous Block Copolymer Membranes with Intrinsically Active Surfaces for Size-selective Separation**

*Zhaogen Wang, Xueping Yao, and Yong Wang\**

State Key Laboratory of Materials-Oriented Chemical Engineering, College of  
Chemistry and Chemical Engineering, Nanjing University of Technology, Nanjing  
210009, Jiangsu (P. R. China)

Fax: 0086-25-8317 2292

E-mail: yongwang@njut.edu.cn

**Figure S1**

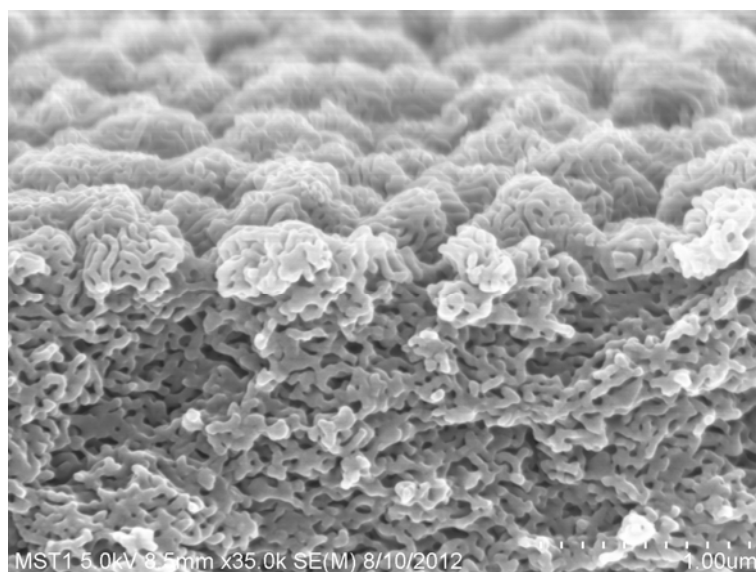

**Figure S1.** The 45°-tilted SEM image of the composite membrane showing both the surface and the cross section, demonstrating the interconnected mesopores in the PS-*b*-P2VP coating layer prepared at 15 h ethanol swelling.

**Figure S2**

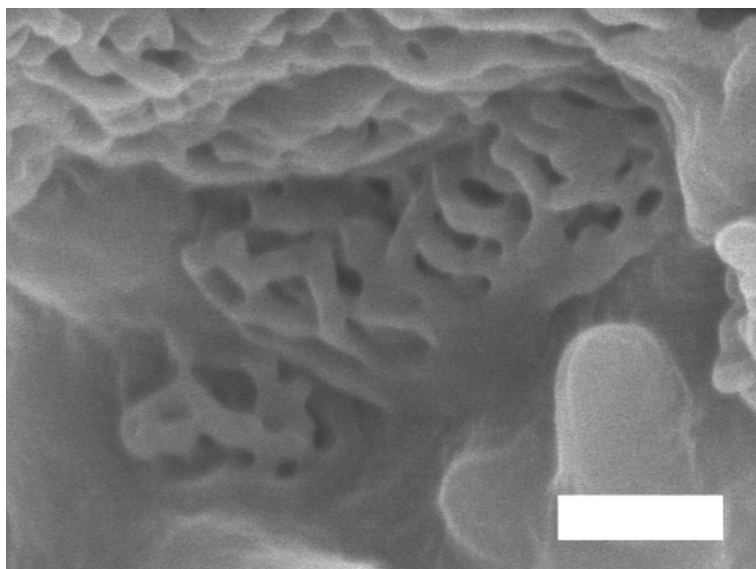

**Figure S2.** The SEM image of a PVDF macropore near the interface between the PVDF substrate and the coated BCP layer, which was filled with mesoporous PS-*b*-P2VP. The scale bar corresponds to 500 nm.

**Figure S3**

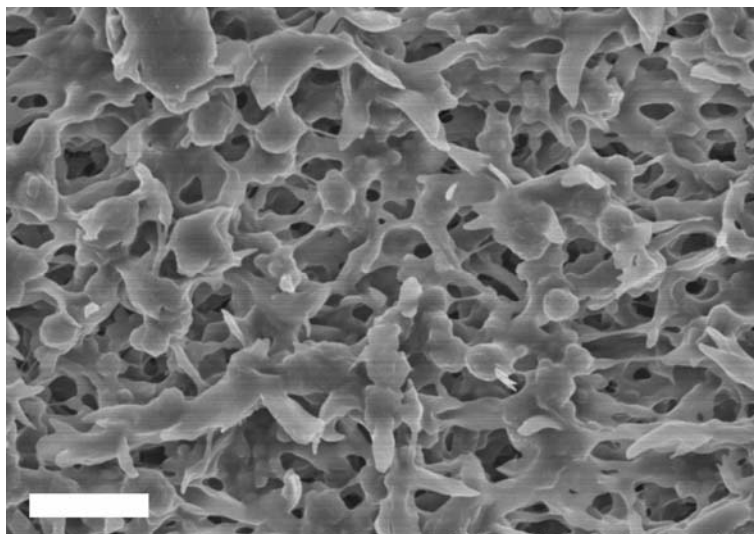

**Figure S3.** The surface SEM image of the macroporous PVDF supporting membrane.

The scale bar corresponds to 2  $\mu\text{m}$ .

**Figure S4**

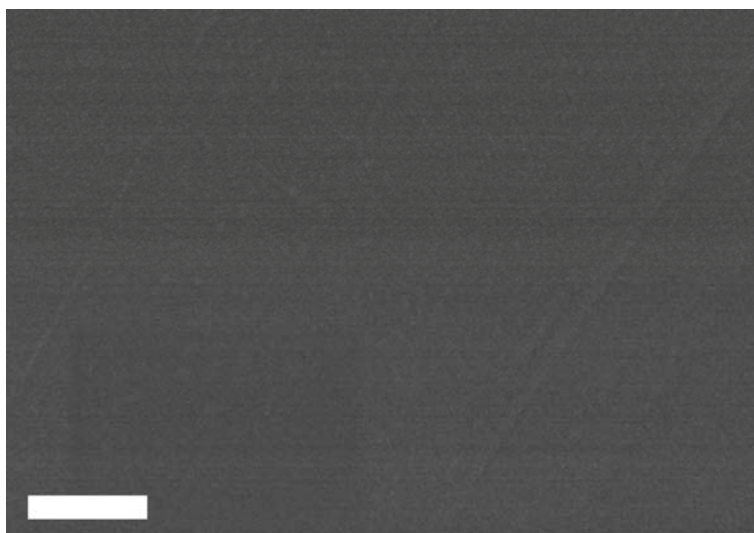

**Figure S4.** The surface SEM image of the as-coated PS-*b*-P2VP film before swelling, showing its nonporous nature. The scale bar corresponds to 200 nm.
